# Supplementary material for: Boosting photoprogramming performance of molecular-switch-embedded organic transistors via structural optimization of polymer semiconductors
Source: Royal Society of Chemistry journal article supplement (doi:10.1039/d2tc03753j), 2023-01-01
Supplement: d2tc03753j1.pdf [file d2tc03753j1.pdf]

## Electronic Supplementary Information (ESI)

### **Boosting Photoprogramming Performance of Molecular-switch-embedded Organic Transistors via Structural Optimization of Polymer Semiconductors**

Seong Hoon Yu,<sup>a</sup> Syed Zahid Hassan,<sup>a</sup> Sangjun Lee,<sup>a</sup> Bogyu Lim<sup>\*b</sup> and Dae Sung Chung<sup>\*a</sup>

<sup>a</sup> Department of Chemical Engineering, Pohang University of Science & Technology (POSTECH), Pohang 37673, Republic of Korea.

<sup>b</sup> Center for Advanced Specialty Chemicals, Korea Research Institute of Chemical Technology (KRICT), Ulsan 44412, Republic of Korea.

\* Correspondence: [bglim@kRICT.re.kr](mailto:bglim@kRICT.re.kr) (B. Lim)

\* Correspondence: [dchung@posetech.ac.kr](mailto:dchung@posetech.ac.kr) (D. S. Chung)

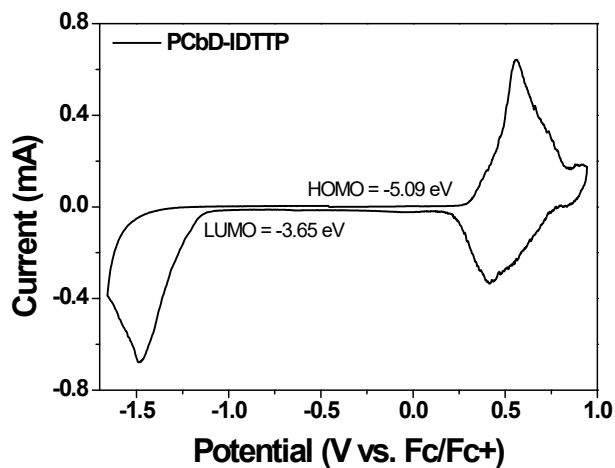

Fig. S1. CV profile of PCbD-IDTTP.

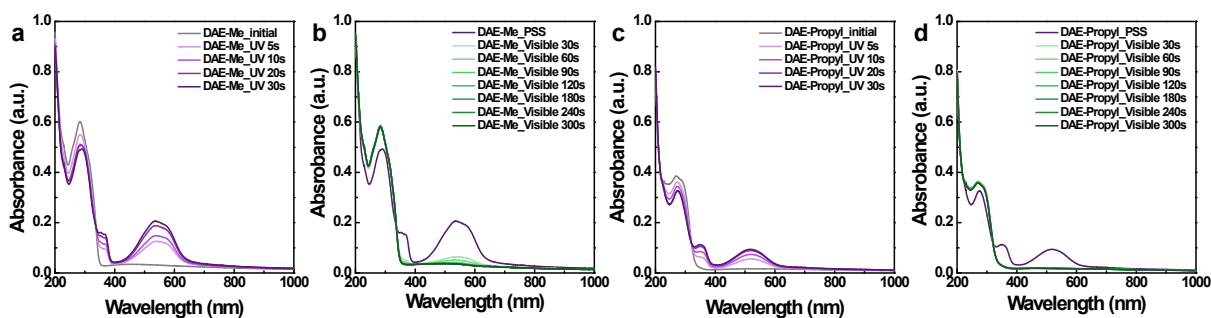

Fig. S2. UV-vis absorption spectra of a) DAE-Me film irradiated upon continuous UV light exposure time, b) DAE-Me film irradiated upon continuous visible light exposure time, c) DAE-Propyl film irradiated upon continuous UV light exposure time and d) DAE-Propyl film irradiated upon continuous visible light exposure time.

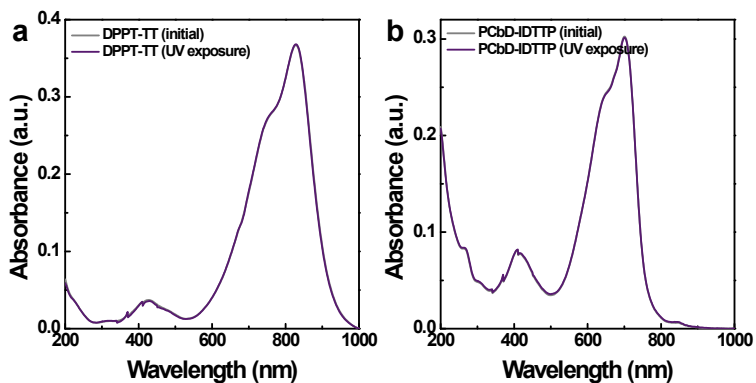

Fig. S3. UV-vis absorption spectra of a) DPPT-TT film and b) PCbD-IDTTP film.

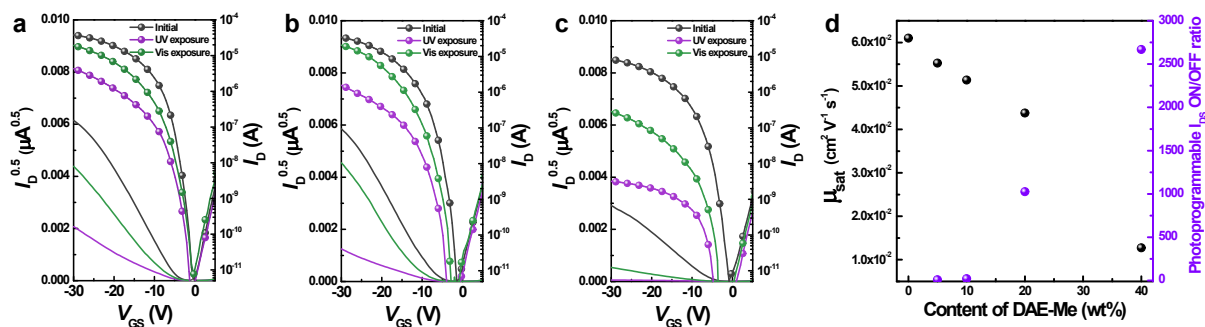

**Fig. S4.** Photoprogrammable switching behaviour of FETs based PCbD-IDTTP with a) 5 wt%, b) 10 wt% and c) 40 wt% of DAE-Me. d) Changes in saturation mobility and photoprogrammable  $I_{DS}$  ON/OFF ratio according to DAE-Me content. All values were extracted from transfer curves of Fig. S4 a-c and Fig. 5d at  $V_{GS}=-30$  V and  $V_{DS}=-30$  V.

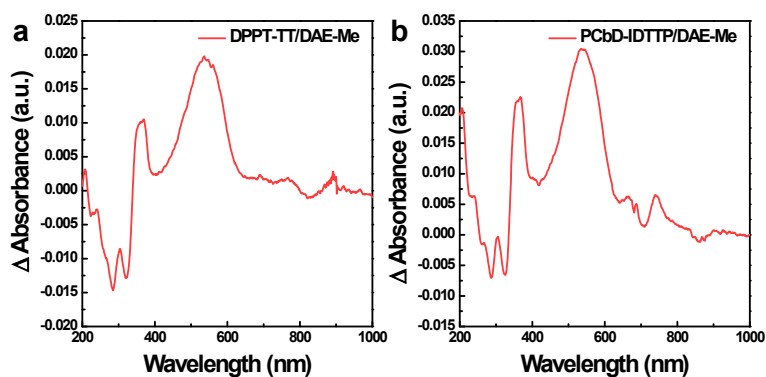

**Fig. S5.** The differential changes in absorbance after UV exposure (312 nm) for a) DPPT-TT/DAE-Me and b) PCbD-IDTTP/DAE-Me film.

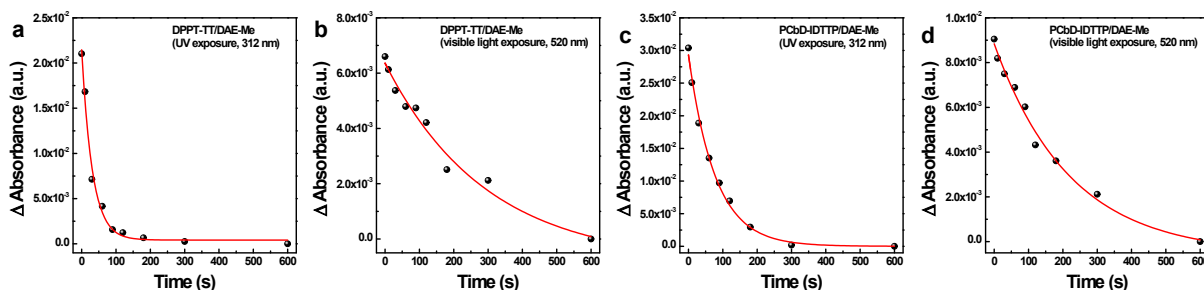

**Fig. S6.** Changes in absorbance at 537 nm as a function of irradiation time (black symbol) and fitted curves (red line) in a and b) DPPT-TT/DAE-Me and c and d) PCbD-IDTTP/DAE-Me films.

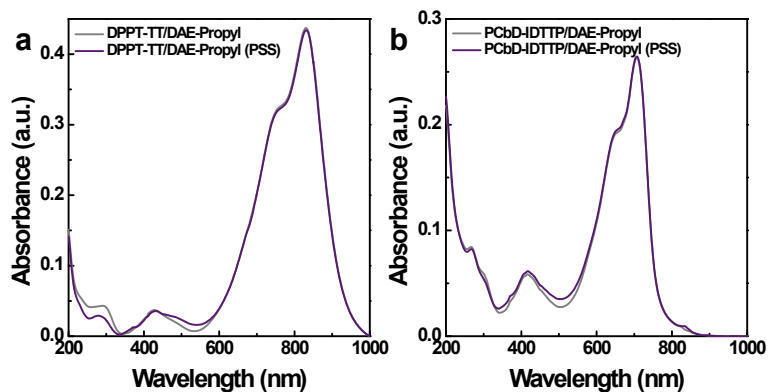

**Fig. S7.** UV-vis absorption spectra of a) DPPT-TT/DAE-Propyl film and b) PCbD-IDTTP/DAE-Propyl film.

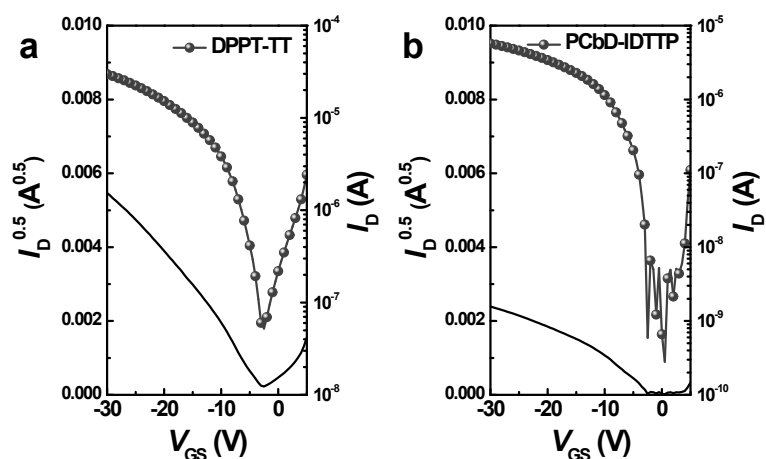

**Fig. S8.** Transfer curves of the FET with bottom-gate top-contact structure based on a) DPPT-TT and b) PCbD-IDTTP.

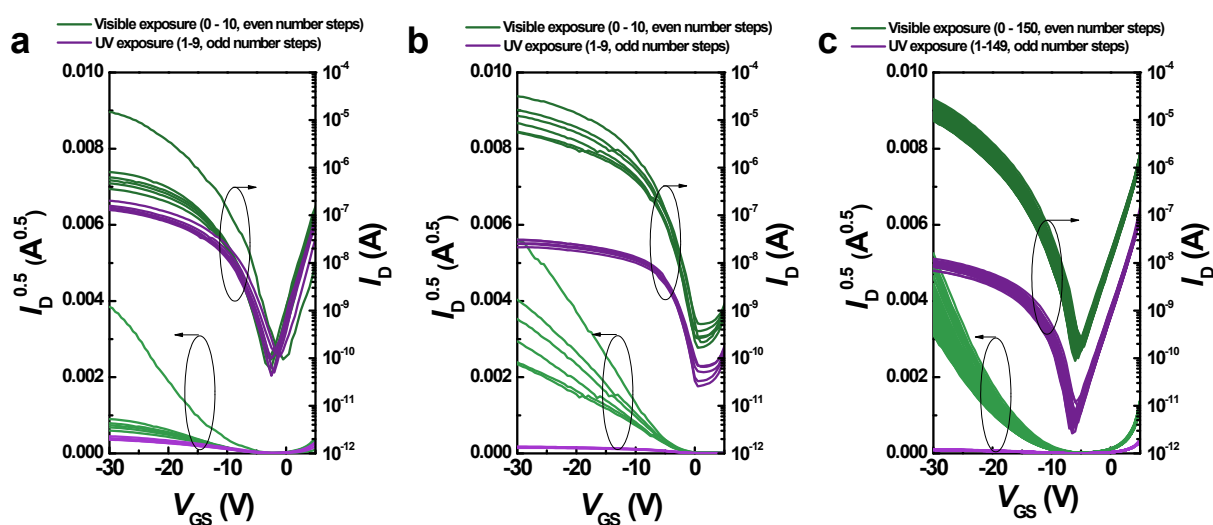

**Fig. S9.** Photoprogrammable switching behavior of FETs based on a) DPPT-TT/DAE-Me, b) PCbD-IDTTP/DAE-Me and c) PCbD-IDTTP/DAE-Propyl. The corresponding photoprogrammed reversible switching behavior after irradiation with UV (312 nm) and visible light (520 nm) in up to 10 steps for DPPT-TT/DAE-Me and PCbD-IDTTP/DAE-Me and 150 steps for PCbD-IDTTP/DAE-Propyl, respectively. The UV light irradiation time was fixed at 30 s and the visible light irradiation time was fixed at 300 s.

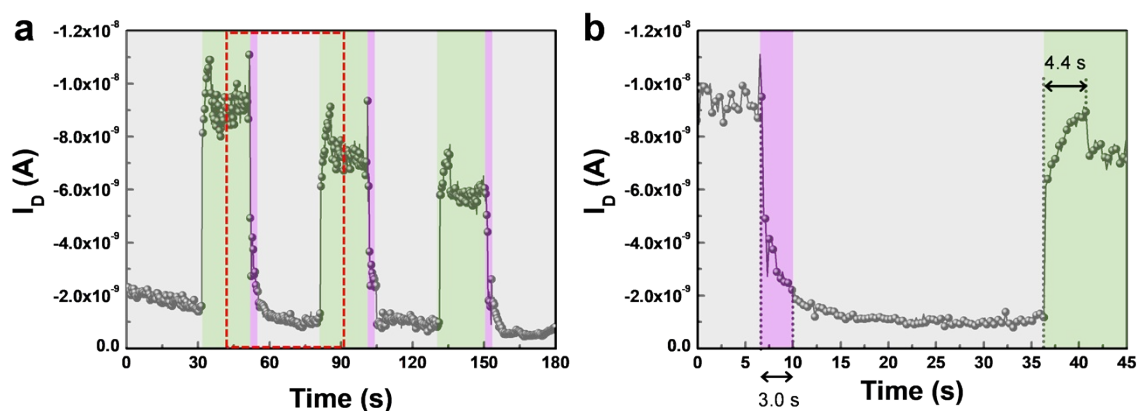

**Fig. S10.** Dynamic current modulation of PCbD-IDTTP/DAE-Propyl devices for a) three cycles of visible light (light green region), UV (violet region) and dark (light grey region) condition ( $V_{GS} = -20$  V and  $V_{DS} = -5$  V). b) Dynamic current modulation corresponding to the red dotted line area in Fig. S10a.

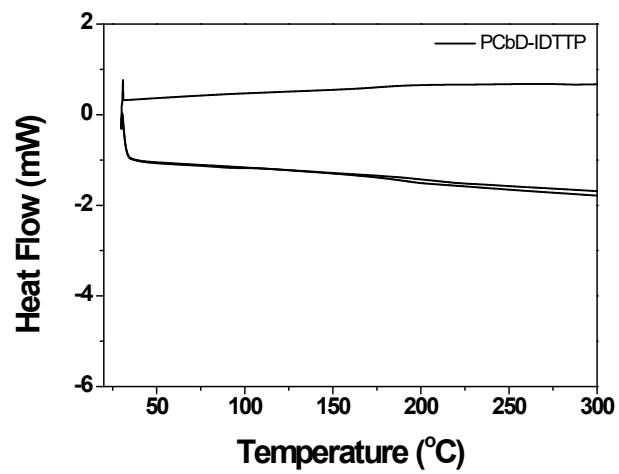

Fig. S11. Differential scanning calorimeter result of PCbD-IDTTP.

**Table S1.** Photophysical properties of DAEs and polymer/DAE blend films

| System                        | $\lambda_{\max}$ [nm] <sup>a)</sup> |             | PSS [%] <sup>b)</sup> | $\Phi_{UV}$ [%] <sup>c)</sup> | $\Phi_{vis}$ [%] <sup>d)</sup> |
|-------------------------------|-------------------------------------|-------------|-----------------------|-------------------------------|--------------------------------|
|                               | open form                           | closed form |                       |                               |                                |
| DAE-Me solution <sup>a)</sup> | 279                                 | 520         | 92                    | 43                            | 0.8                            |
| DAE-Me film <sup>a)</sup>     | 286                                 | 543         | 56                    | 42                            | 0.11                           |
| DPPT-TT/DAE-Me film           | 285                                 | 537         | 61                    | 62                            | 0.08                           |
| PCbD-IDTTP/DAE-Me film        | 286                                 | 537         | 42                    | 24                            | 0.28                           |

<sup>a)</sup>Reported value from reference 1; <sup>b)</sup>Amount of the closed form in PSS upon UV light exposure (312 nm); Quantum yields upon <sup>c)</sup>UV and <sup>d)</sup>visible light exposure with the experimental error of 10%.

**Table S2.** Morphological characteristics for polymer and polymer/DAE blend films

| System            | $R_{RMS}$ [nm] | Lamellar spacing [Å] | $\pi$ - $\pi$ stacking spacing [Å] |       |
|-------------------|----------------|----------------------|------------------------------------|-------|
|                   |                |                      | $q_{xy}$                           | $q_z$ |
| DPPT-TT           | 0.729          | 21.71                | 3.76                               | 3.80  |
| DPPT-TT/DAE-Me    | 0.787          | 22.40                | 3.77                               | N/A   |
| PCbD-IDTTP        | 0.293          | 19.73                | 4.21                               | 4.19  |
| PCbD-IDTTP/DAE-Me | 0.409          | 19.86                | 4.20                               | 4.20  |

**Table S3.** Summary of photoprogrammable performance of DAE-embedded OFETs.

| System                       | Saturation hole mobility [ $\text{cm}^2 \text{V}^{-1} \text{s}^{-1}$ ] | Maximum photoprogrammable $I_{DS}$ ON/OFF ratio | Maximum number of repeating steps | Photoprogrammable $I_{DS}$ ON/OFF ratio retention between initial and final step [%] | References |
|------------------------------|------------------------------------------------------------------------|-------------------------------------------------|-----------------------------------|--------------------------------------------------------------------------------------|------------|
| P3HT/DAE-Me                  | N/A                                                                    | approximately 10                                | 4                                 | 85 <sup>a)</sup>                                                                     | 1          |
| P3HT/DAE- <sup>t</sup> Bu    | N/A                                                                    | approximately 10                                | 4                                 | 71 <sup>a)</sup>                                                                     | 1          |
| F8T2/DAE-Me                  | $1.5 \times 10^{-4}$                                                   | approximately 1,000                             | 4                                 | 75 <sup>a)</sup>                                                                     | 1          |
| F8T2/DAE- <sup>t</sup> Bu    | $6 \times 10^{-3}$                                                     | approximately 1,000                             | 4                                 | 90 <sup>a)</sup>                                                                     | 1          |
| DPPT-TT/DAE-Me               | $2 \times 10^{-2}$                                                     | approximately 100                               | 4                                 | 2 <sup>a)</sup>                                                                      | 1          |
| DPPT-TT/DAE- <sup>t</sup> Bu | $1 \times 10^{-2}$                                                     | approximately 100                               | 4                                 | 98 <sup>a)</sup>                                                                     | 1          |
| DPPT-TT/DAE-Propyl           | $6.40 \times 10^{-2}$                                                  | 4,405                                           | 100                               | 18                                                                                   | 2          |
| DPPT-TT/DAE-Me               | $3.02 \times 10^{-2}$                                                  | 73                                              | 10                                | 5                                                                                    | This work  |
| PCbD-IDTTP/DAE-Me            | $4.37 \times 10^{-2}$                                                  | 1,026                                           | 10                                | 26                                                                                   | This work  |
| PCbD-IDTTP/DAE-Propyl        | $5.38 \times 10^{-2}$                                                  | 2,588                                           | 150                               | 46                                                                                   | This work  |

<sup>a)</sup> Estimated values from output current in reversible modulation step.

## References

- 1 L. Hou, T. Leydecker, X. Zhang, W. Rekab, M. Herder, C. Cendra, S. Hecht, I. McCulloch, A. Salleo, E. Orgiu and P. Samori, *J. Am. Chem. Soc.*, 2020, **142**, 11050.
- 2 S. Z. Hassan, J. Song, S. H. Yu and D. S. Chung, *Chem. Mater.*, 2021, **33**, 7546.
